# Supplementary material
Source: publisher site journal article supplement (https://www.spandidos-publications.com/2868/downloadSupplementary)
Supplement: Supplementary file 1 [file downloadSupplementary]

## Sheet: Sheet1
Table SI. The 52 predicted cis-targets of 44 differentially expressed lncRNAs.
LncRNAs	Cis_Target_GeneSymbol	Cis_Target_Gene_description
ENST00000435915	ABCA1	ATP binding cassette subfamily A member 1 [Source:HGNC Symbol-3BAcc:HGNC:29]
lnc-PNMA2-5:1	ADRA1A	adrenoceptor alpha 1A [Source:HGNC Symbol-3BAcc:HGNC:277]
lnc-HBS1L-2:1	AHI1	Abelson helper integration site 1 [Source:HGNC Symbol-3BAcc:HGNC:21575]
lnc-TSPAN13-5:1	AHR	aryl hydrocarbon receptor [Source:HGNC Symbol-3BAcc:HGNC:348]
lnc-ANAPC1-1:2	ANAPC1	anaphase promoting complex subunit 1 [Source:HGNC Symbol-3BAcc:HGNC:19988]
lnc-ANXA4-2:1	ANXA4	annexin A4 [Source:HGNC Symbol-3BAcc:HGNC:542]
lnc-AC011298.2.1-2:1	AQP12B	aquaporin 12B [Source:HGNC Symbol-3BAcc:HGNC:6096]
lnc-BAG1-1:1	BAG1	BCL2 associated athanogene 1 [Source:HGNC Symbol-3BAcc:HGNC:937]
NONHSAT078227	C20orf194	chromosome 20 open reading frame 194 [Source:HGNC Symbol-3BAcc:HGNC:17721]
lnc-CDC123-3:1	CAMK1D	calcium/calmodulin dependent protein kinase ID [Source:HGNC Symbol-3BAcc:HGNC:19341]
ENST00000441971	CDK14	cyclin dependent kinase 14 [Source:HGNC Symbol-3BAcc:HGNC:8883]
lnc-FGB-3:1	DCHS2	dachsous cadherin-related 2 [Source:HGNC Symbol-3BAcc:HGNC:23111]
NR_126376	DLX2	distal-less homeobox 2 [Source:HGNC Symbol-3BAcc:HGNC:2915]
lnc-CHI3L2-1:1	DRAM2	DNA damage regulated autophagy modulator 2 [Source:HGNC Symbol-3BAcc:HGNC:28769]
NR_038275	FAM21A	family with sequence similarity 21 member A [Source:HGNC Symbol-3BAcc:HGNC:23416]
lnc-RP11-324D17.2.1-6:1	FTO	fat mass and obesity associated [Source:HGNC Symbol-3BAcc:HGNC:24678]
lnc-ANXA4-2:1	GMCL1	germ cell-less-2C spermatogenesis associated 1 [Source:HGNC Symbol-3BAcc:HGNC:23843]
ENST00000615847	ITGB2	integrin subunit beta 2 [Source:HGNC Symbol-3BAcc:HGNC:6155]
lnc-ASB7-5:1	LINS1	lines homolog 1 [Source:HGNC Symbol-3BAcc:HGNC:30922]
NR_024560	MAPT	microtubule associated protein tau [Source:HGNC Symbol-3BAcc:HGNC:6893]
ENST00000619201	MCM8	minichromosome maintenance 8 homologous recombination repair factor [Source:HGNC Symbol-3BAcc:HGNC:16147]
lnc-MOK-1:2	MOK	MOK protein kinase [Source:HGNC Symbol-3BAcc:HGNC:9833]
ENST00000455835	MYADM	myeloid-associated differentiation marker [Source:HGNC Symbol-3BAcc:HGNC:7544]
lnc-SYNPO-1:1	MYOZ3	myozenin 3 [Source:HGNC Symbol-3BAcc:HGNC:18565]
ENST00000591675	NRDC	nardilysin convertase [Source:HGNC Symbol-3BAcc:HGNC:7995]
lnc-NAT1-4:1	PCM1	pericentriolar material 1 [Source:HGNC Symbol-3BAcc:HGNC:8727]
lnc-DSTN-1:1	PCSK2	proprotein convertase subtilisin/kexin type 2 [Source:HGNC Symbol-3BAcc:HGNC:8744]
lnc-IDH1-2:1	PIKFYVE	phosphoinositide kinase-2C FYVE-type zinc finger containing [Source:HGNC Symbol-3BAcc:HGNC:23785]
ENST00000570072	PKD1	polycystin 1-2C transient receptor potential channel interacting [Source:HGNC Symbol-3BAcc:HGNC:9008]
lnc-FBXO41-2:1	PRADC1	protease associated domain containing 1 [Source:HGNC Symbol-3BAcc:HGNC:16047]
lnc-RBM23-1:1	PRMT5	protein arginine methyltransferase 5 [Source:HGNC Symbol-3BAcc:HGNC:10894]
lnc-IDH1-2:1	PTH2R	parathyroid hormone 2 receptor [Source:HGNC Symbol-3BAcc:HGNC:9609]
lnc-RBM23-1:1	RBM23	RNA binding motif protein 23 [Source:HGNC Symbol-3BAcc:HGNC:20155]
lnc-RC3H2-1:1	RC3H2	ring finger and CCCH-type domains 2 [Source:HGNC Symbol-3BAcc:HGNC:21461]
lnc-C9orf125-1:1	RNF20	ring finger protein 20 [Source:HGNC Symbol-3BAcc:HGNC:10062]
NONHSAT089168	RPL14	ribosomal protein L14 [Source:HGNC Symbol-3BAcc:HGNC:10305]
lnc-SYF2-3:4	RSRP1	arginine and serine rich protein 1 [Source:HGNC Symbol-3BAcc:HGNC:25234]
lnc-DBT-1:3	RTCA	RNA 3'-terminal phosphate cyclase [Source:HGNC Symbol-3BAcc:HGNC:17981]
NR_034072	SARS	seryl-tRNA synthetase [Source:HGNC Symbol-3BAcc:HGNC:10537]
lnc-SCD-1:8	SCD	stearoyl-CoA desaturase [Source:HGNC Symbol-3BAcc:HGNC:10571]
lnc-FBXO41-2:1	SMYD5	SMYD family member 5 [Source:HGNC Symbol-3BAcc:HGNC:16258]
lnc-BAG1-1:1	SPINK4	serine peptidase inhibitor-2C Kazal type 4 [Source:HGNC Symbol-3BAcc:HGNC:16646]
lnc-SYNPO-1:1	SYNPO	synaptopodin [Source:HGNC Symbol-3BAcc:HGNC:30672]
ENST00000603981	TAF15	TATA-box binding protein associated factor 15 [Source:HGNC Symbol-3BAcc:HGNC:11547]
NR_015451	TCP11L1	t-complex 11 like 1 [Source:HGNC Symbol-3BAcc:HGNC:25655]
lnc-HSP90B1-3:1	TDG	thymine DNA glycosylase [Source:HGNC Symbol-3BAcc:HGNC:11700]
NONHSAT079642	TGM2	transglutaminase 2 [Source:HGNC Symbol-3BAcc:HGNC:11778]
ENST00000609511	TMEM165	transmembrane protein 165 [Source:HGNC Symbol-3BAcc:HGNC:30760]
NONHSAT035002	TPP2	tripeptidyl peptidase 2 [Source:HGNC Symbol-3BAcc:HGNC:12016]
lnc-FAN1-1:3	TRPM1	transient receptor potential cation channel subfamily M member 1 [Source:HGNC Symbol-3BAcc:HGNC:7146]
ENST00000570072	TSC2	tuberous sclerosis 2 [Source:HGNC Symbol-3BAcc:HGNC:12363]
lnc-MOK-1:2	WDR20	WD repeat domain 20 [Source:HGNC Symbol-3BAcc:HGNC:19667]
lncRNA, long non-coding RNA.
